# Supplementary material for: Grief Iconography between Italians and Americans: A Comparative Study on How Mourning Is Visually Expressed on Social Media
Source: MDPI journal article supplement (doi:10.3390/bs11070104), 2021-07-20
Supplement: s1 [file s1]

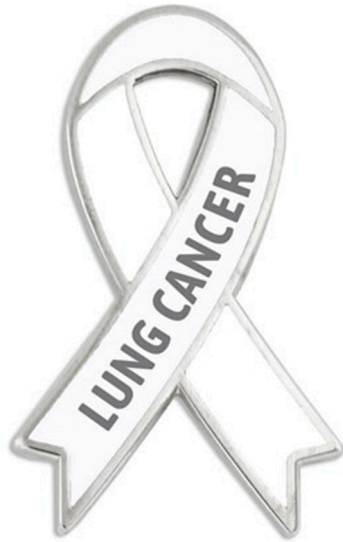

This representation has been coded as "image" and "object".

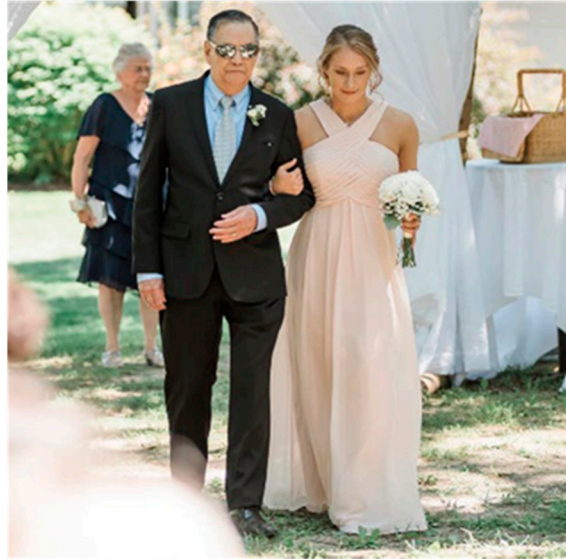

This representation has been coded as "picture", "person", "conjoint appearance" (father and daughter are depicted) and "special occasion" (a wedding is depicted).

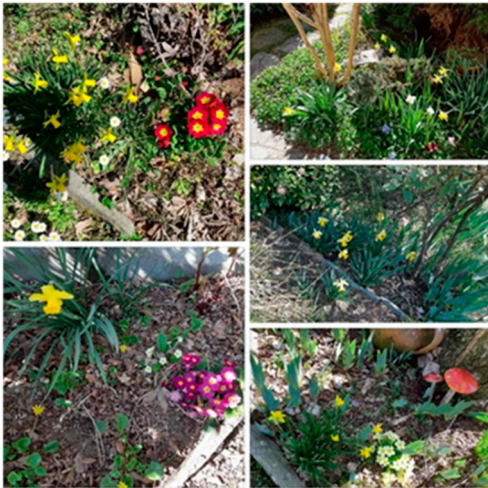

This representation has been coded as "picture", "object" and "refined representation".

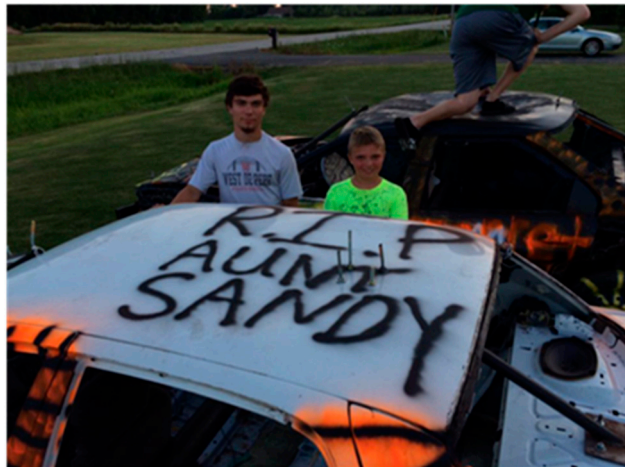

This representation has been coded as "image", "person", and "object" (we used both categories because both mourners and the car receive some consideration).

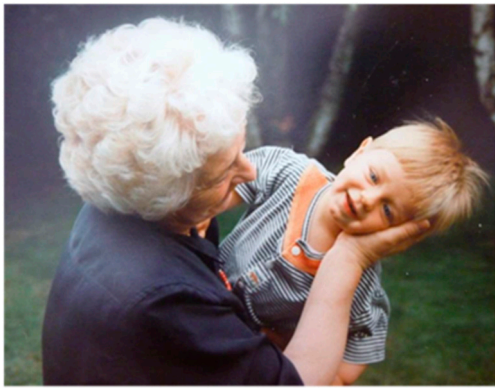

This representation has been coded as “picture”, “person”, “conjoint appearance”, “positive emotional connotation”, “youth of the participant” and “act of kindness and caring”.

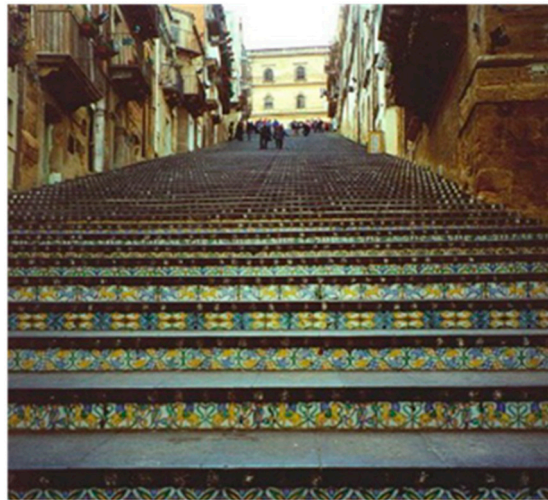

This representation has been coded as “picture” and “setting”.

**Figure S1.** Six images sent by participants and coded by authors.
